# Supplementary material for: Integrin-Rac signalling for mammary epithelial stem cell self-renewal
Source: Springer Nature journal article supplement (doi:10.1186/s13058-018-1048-1), 2018-10-22

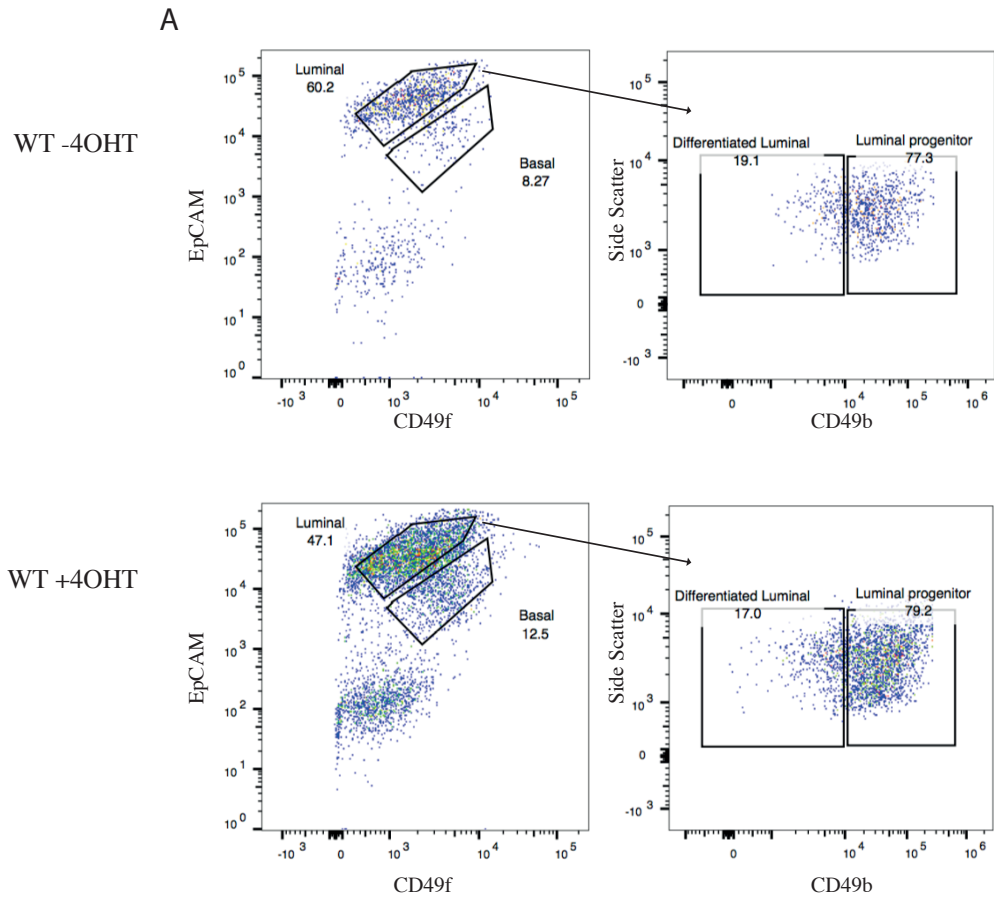

**B**

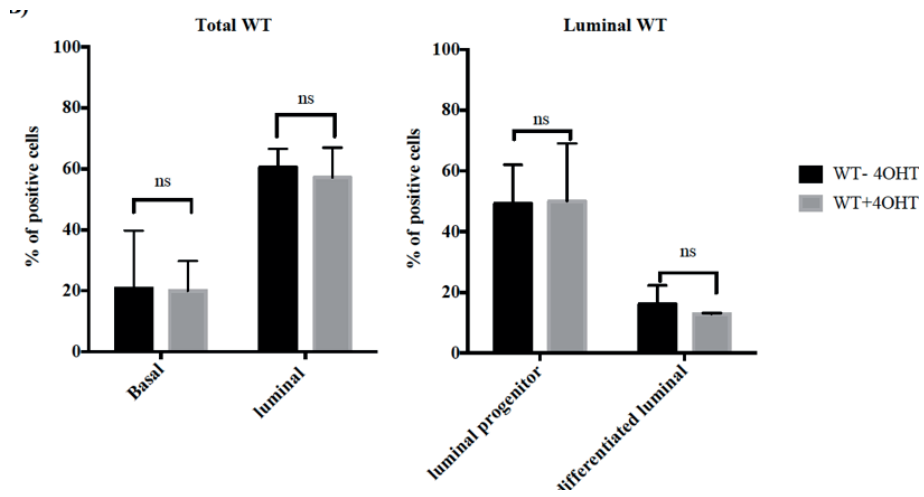

**C**

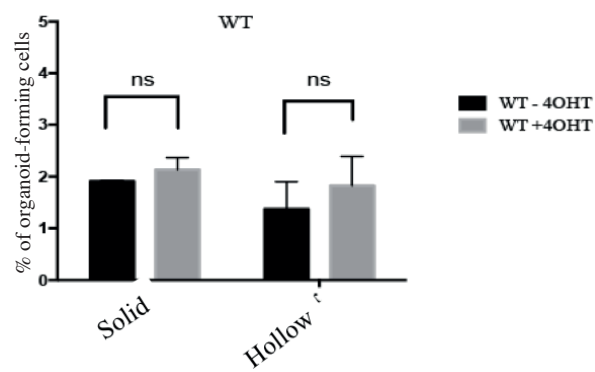

Supplement: MOESM1 [file 16217454]
