# Supplementary material for: Integrin-Rac signalling for mammary epithelial stem cell self-renewal
Source: Springer Nature journal article supplement (doi:10.1186/s13058-018-1048-1), 2018-10-22
Supplement: MOESM2 [file 16217454]

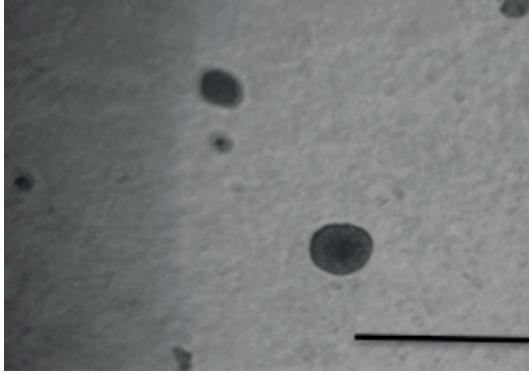

CD49f<sup>high</sup>, EPCAM<sup>low</sup>

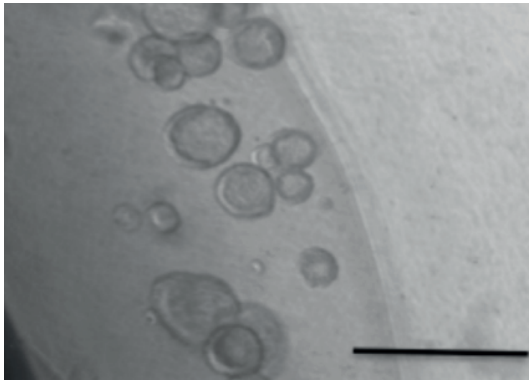

CD49f<sup>low</sup>, EPCAM<sup>high</sup>, CD49b<sup>high</sup>

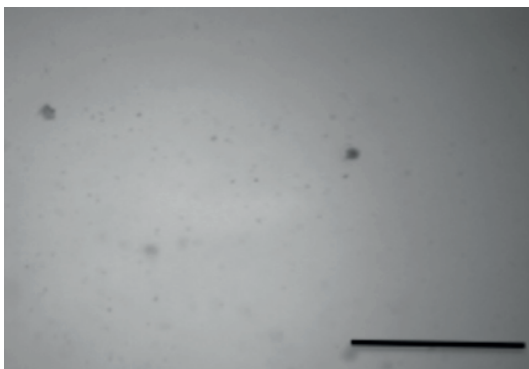

CD49f<sup>low</sup>, EPCAM<sup>high</sup>, CD49b<sup>low</sup>
